# Supplementary material for: Interventions to promote access to eye care for non-Indigenous, non-dominant ethnic groups in high-income countries: a scoping review protocol
Source: PubMed Central journal article supplement (PMC7279662; doi:10.1136/bmjopen-2019-033775), 2020-06-03
Supplement: bmjopen-2019-033775supp001.pdf [file bmjopen-2019-033775supp001.pdf]

**Appendix: Search strategy****MEDLINE (Ovid)**

1. exp Ophthalmology/
2. Optometry/
3. ((eye\$ or ocular or vision) adj2 (care or health or service\$)).tw.
4. visual acuity.tw.
5. (ophthalm\$ or optomet\$).tw.
6. exp Eye Diseases/
7. (glaucoma\$ or ocular hypertension or cataract\$).tw.
8. ((diabet\$ or proliferat\$) adj3 retinopath\$).tw.
9. (diabet\$ adj3 (eye\$ or vision or visual\$ or sight\$)).tw.
10. (retinopath\$ adj3 (eye\$ or vision or visual\$ or sight\$)).tw.
11. (dilated adj2 fundus).tw.
12. (retinal adj2 exam\$).tw.
13. (myop\$ or hyperop\$ or hypermetrop\$ or anisometrop\$ or ammetrop\$ or astigmati\$ or presbyop\$).tw.
14. (refractive adj1 error\$).tw.
15. Eyeglasses/
16. (spectacle or spectacles or glasses).tw.
17. (eyeglasses or eye glasses).tw.
18. or/1-17
19. Ethnic Groups/
20. Minority Groups/
21. ((ethnic\$ or racial\$ or cultur\$) adj3 (group\$ or minorit\$ or population\$ or diverse\$ or origin\$)).tw.
22. ((ethnic\$ or racial\$ or cultur\$) adj3 (inequalit\$ or inequit\$ or disparit\$ or equit\$ or disadvantage\$ or depriv\$)).tw.
23. ((population\$ or communit\$) adj3 (divers\$ or disadvantage\$ or depriv\$)).tw.
24. non-Indigenous.tw.
25. (visible adj1 minorit\$).tw.
26. Refugees/
27. "emigrants and immigrants"/
28. (migrant\$ or immigrant\$ or emigrant\$ or refugee\$ or expatriate\$).tw.
29. asylum seeker\$.tw.
30. Urban Population/
31. urban poor.tw.
32. Cultural Characteristics/
33. Cross-Cultural Comparison/
34. Cultural Diversity/
35. Cultural competency/
36. Cultural deprivation/
37. exp African Continental Ancestry Group/
38. exp Asian Continental Ancestry Group/
39. Continental Population Groups/
40. geography.tw.
41. (Afr\$ adj2 American\$).tw.
42. (Afr\$ adj2 Caribbean\$).tw.
43. (west adj2 (india\$ or indies)).tw.
44. (American\$ adj1 black).tw.
45. (Asian\$ or Indian\$ or Pakistan\$ or Bangladesh\$ or Bengal\$).tw.
46. ((Asia\$ or Pacific) adj4 American\$).tw.
47. ((Asia\$ or Pacific) adj4 Islander\$).tw.
48. (Hispanic or Latino or Latin American\$ or Puerto Ric\$ or Mexican\$).tw.
49. or/19-48
50. Program Evaluation/
51. program\$.tw.
52. ((educat\$ or behaviour\$ or behavior\$ or improv\$) adj3 (intervention\$ or activat\$)).tw.
53. Delivery of Health Care/
54. Health Services Accessibility/
55. Patient Acceptance of Health Care/
56. Health Promotion/
57. (health adj2 (promotion\$ or knowledge or belief\$)).tw.
58. Health Education/
59. (educat\$ adj2 (information or material or leaflet)).tw.
60. Health Knowledge, Attitudes, Practice/
61. Patient Education as Topic/
62. Persuasive Communication/
63. "Surveys and Questionnaires"/
64. Questionnaires/
65. Focus Groups/
66. Health Surveys/
67. Health Care Surveys/

## Eye care interventions to promote access for non-dominant ethnic groups

Hamm *et al.*

68. Interviews as Topic/  
 69. (questionnaire\$ or survey\$).tw.  
 70. (focus adj3 group\$).tw.  
 71. exp Reminder Systems/  
 72. remind\$.tw.  
 73. Telephone/  
 74. telephone.tw.  
 75. phone call.tw.  
 76. Health Behavior/  
 77. Behavior Therapy/  
 78. (behavioral or behavior or behaviour or behavioural).tw.  
 79. (increas\$ adj3 (attend\$ or uptake)).tw.  
 80. (approachability or acceptability or availability or affordability or appropriateness).tw.  
 81. (ability adj2 (perceive or seek or reach or pay or engage)).tw.  
 82. exp Vision Tests/  
 83. Mass Screening/  
 84. (vision adj3 (test\$ or screen\$ or assess\$)).tw.
85. (eye\$ adj3 (test\$ or screen\$ or assess\$)).tw.  
 86. ((target\$ or tailor\$) adj3 intervention\$).tw.  
 87. (cultural\$ adj3 (sensitiv\$ or appropriate)).tw.  
 88. or/50-87  
 89. 18 and 49 and 88  
 90. exp developing countries/  
 91. 89 not 90  
 92. prevalence.ti.  
 93. (genetic or mutation\$ or autosomal or variant\$).ti.  
 94. optical coherence tomography.tw.  
 95. (Latin American and Caribbean Health Sciences).tw.  
 96. or/92-95  
 97. 91 not 96  
 98. exp case report/  
 99. (case\$ adj3 (report\$ or series)).tw.  
 100. 98 or 99  
 101. 97 not 100

**Embase (Ovid)**

1. ophthalmology/  
 2. optometry/  
 3. optometrist/  
 4. ((eye\$ or ocular or vision) adj2 (care or health or service\$)).tw.  
 5. visual acuity.tw.  
 6. (ophthalm\$ or optomet\$).tw.  
 7. exp eye disease/  
 8. (glaucoma\$ or ocular hypertension or cataract\$).tw.  
 9. ((diabet\$ or proliferat\$) adj3 retinopath\$).tw.  
 10. (diabet\$ adj3 (eye\$ or vision or visual\$ or sight\$)).tw.  
 11. (retinopath\$ adj3 (eye\$ or vision or visual\$ or sight\$)).tw.  
 12. eye fundus/  
 13. (dilated adj2 fundus).tw.  
 14. (retinal adj2 exam\$).tw.  
 15. (myop\$ or hyperop\$ or hypermetrop\$ or anisometrop\$ or ammetrop\$ or astigmati\$ or presbyop\$).tw.  
 16. (refractive adj1 error\$).tw.  
 17. spectacles/  
 18. (spectacle or spectacles or glasses).tw.  
 19. (eyeglasses or eye glasses).tw.  
 20. or/1-19  
 21. "ethnic or racial aspects"/  
 22. ethnic group/  
 23. minority group/  
 24. ((ethnic\$ or racial\$ or cultur\$) adj3 (group\$ or minorit\$ or population\$ or diverse\$ or origin\$)).tw.  
 25. ((ethnic\$ or racial\$ or cultur\$) adj3 (inequalit\$ or inequit\$ or disparit\$ or equit\$ or disadvantage\$ or depriv\$)).tw.  
 26. ((population\$ or communit\$) adj3 (divers\$ or disadvantage\$ or depriv\$)).tw.  
 27. non-Indigenous.tw.  
 28. (visible adj1 minorit\$).tw.  
 29. refugee/  
 30. asylum seeker/  
 31. "emigrants and immigrants"/  
 32. (migrant\$ or immigrant\$ or emigrant\$ or refugee\$ or expatriate\$).tw.  
 33. asylum seeker\$.tw.  
 34. urban population/

## Eye care interventions to promote access for non-dominant ethnic groups

Hamm et al.

35. urban poor.tw.  
 36. cultural factor/  
 37. cultural diversity/  
 38. cultural competence/  
 39. cultural deprivation/  
 40. ancestry group/  
 41. exp african american/  
 42. african caribbean/  
 43. black person/  
 44. negro/  
 45. "Caribbean (person)"/  
 46. asian continental ancestry group/  
 47. asian american/  
 48. population group/  
 49. hispanic/  
 50. geography.tw.  
 51. (Afr\$ adj2 American\$.tw.  
 52. (Afr\$ adj2 Caribbean\$.tw.  
 53. (west adj2 (india\$ or indies)).tw.  
 54. (American\$ adj1 black).tw.  
 55. (Asian\$ or Indian\$ or Pakistan\$ or Bangladesh\$ or Bengal\$.tw.  
 56. ((Asia\$ or Pacific) adj4 American\$.tw.  
 57. ((Asia\$ or Pacific) adj4 Islander\$.tw.  
 58. (Hispanic or Latino or Latin American\$ or Puerto Ric\$ or Mexican\$.tw.  
 59. or/21-58  
 60. program evaluation/  
 61. program\$.tw.  
 62. ((educat\$ or behaviour\$ or behavior\$ or improv\$) adj3 (intervention\$ or activat\$)).tw.  
 63. health care delivery/  
 64. patient attitude/  
 65. health promotion/  
 66. (health adj2 (promotion\$ or knowledge or belief\$)).tw.  
 67. health education/  
 68. (educat\$ adj2 (information or material or leaflet)).tw.  
 69. attitude to health/  
 70. health behavior/  
 71. patient education/  
 72. persuasive communication/  
 73. questionnaires/  
 74. information processing/  
 75. health survey/  
 76. health care survey/  
 77. exp interview/  
 78. (questionnaire\$ or survey\$).tw.  
 79. (focus adj3 group\$).tw.  
 80. reminder system/  
 81. remind\$.tw.  
 82. telephone/  
 83. telephone interview/  
 84. telephone.tw.  
 85. phone call.tw.  
 86. health behavior/  
 87. behavior therapy/  
 88. behavior change/  
 89. (behavioral or behavior or behaviour or behavioural).tw.  
 90. (increas\$ adj3 (attend\$ or uptake)).tw.  
 91. (approachability or acceptability or availability or affordability or appropriateness).tw.  
 92. (ability adj2 (perceive or seek or reach or pay or engage)).tw.  
 93. vision test/  
 94. mass screening/  
 95. (vision adj3 (test\$ or screen\$ or assess\$)).tw.  
 96. (eye\$ adj3 (test\$ or screen\$ or assess\$)).tw.  
 97. ((target\$ or tailor\$) adj3 intervention\$).tw.  
 98. (cultural\$ adj3 (sensitiv\$ or appropriate)).tw.  
 99. or/60-98  
 100. 20 and 59 and 99  
 101. exp developing country/  
 102. 100 not 101  
 103. prevalence.ti.  
 104. (genetic or mutation\$ or autosomal or variant\$.ti.  
 105. optical coherence tomography.tw.  
 106. (Latin American and Caribbean Health Sciences).tw.  
 107. or/103-106  
 108. 102 not 107  
 109. exp case report/  
 110. (case\$ adj3 (report\$ or series)).tw.  
 111. or/109-110  
 112. 108 not 111  
 113. limit 112 to conference abstract status  
 114. 112 not 113

**Global Health (Ovid)**

1. eyes/
2. eye diseases/
3. vision/
4. vision disorders/
5. ((eye\$ or ocular or vision) adj2 (care or health or service\$)).tw.
6. visual acuity.tw.
7. (ophthalm\$ or optomet\$).tw.
8. (glaucoma\$ or ocular hypertension or cataract\$).tw.
9. ((diabet\$ or proliferat\$) adj3 retinopath\$).tw.
10. (diabet\$ adj3 (eye\$ or vision or visual\$ or sight\$)).tw.
11. (retinopath\$ adj3 (eye\$ or vision or visual\$ or sight\$)).tw.
12. (dilated adj2 fundus).tw.
13. (retinal adj2 exam\$).tw.
14. (myop\$ or hyperop\$ or hypermetrop\$ or anisometrop\$ or ammetrop\$ or astigmati\$ or presbyop\$).tw.
15. (refractive adj1 error\$).tw.
16. (spectacle or spectacles or glasses).tw.
17. (eyeglasses or eye glasses).tw.
18. or/1-17
19. ethnic groups/
20. ethnicity/
21. minorities/
22. ((ethnic\$ or racial\$ or cultur\$) adj3 (group\$ or minorit\$ or population\$ or diverse\$ or origin\$)).tw.
23. ((ethnic\$ or racial\$ or cultur\$) adj3 (inequalit\$ or inequit\$ or disparit\$ or equit\$ or disadvantage\$ or depriv\$)).tw.
24. ((population\$ or communit\$) adj3 (divers\$ or disadvantage\$ or depriv\$)).tw.
25. non-Indigenous.tw.
26. (visible adj1 minorit\$).tw.
27. refugees/
28. immigrants/
29. immigration/
30. (migrant\$ or immigrant\$ or emigrant\$ or refugee\$ or expatriate\$).tw.
31. asylum seeker\$.tw.
32. urban population/
33. urban areas/
34. urban poor.tw.
35. geography.tw.
36. african americans/ or african-caribbeans/ or american indians/ or asians/ or black people/ or japanese americans/ or mexican-americans/ or pacific islanders/
37. (Afr\$ adj2 American\$).tw.
38. (Afr\$ adj2 Caribbean\$).tw.
39. (west adj2 (india\$ or indies)).tw.
40. (American\$ adj1 black).tw.
41. (Asian\$ or Indian\$ or Pakistan\$ or Bangladesh\$ or Bengal\$).tw.
42. ((Asia\$ or Pacific) adj4 American\$).tw.
43. or/19-42
44. program evaluation/
45. programs/
46. program\$.tw.
47. ((educat\$ or behaviour\$ or behavior\$ or improv\$) adj3 (intervention\$ or activat\$)).tw.
48. (primary health care or health services or community health or health policy or health care or public health or health programmes).sh.
49. health promotion/
50. (health adj2 (promotion\$ or knowledge or belief\$)).tw.
51. health education/
52. patient education/
53. (educat\$ adj2 (information or material or leaflet)).tw.
54. attitude/
55. communication/
56. questionnaires/
57. discussion groups/
58. surveys/
59. (questionnaire\$ or survey\$).tw.
60. (focus adj3 group\$).tw.
61. remind\$.tw.
62. telephone/
63. telephone.tw.
64. phone call.tw.

## Eye care interventions to promote access for non-dominant ethnic groups

Hamm *et al.*

65. behaviour/  
66. (behavioral or behavior or behaviour or behavioural).tw.  
67. (increas\$ adj3 (attend\$ or uptake)).tw.  
68. (approachability or acceptability or availability or affordability or appropriateness).tw.  
69. (ability adj2 (perceive or seek or reach or pay or engage)).tw.  
70. screening/  
71. (vision adj3 (test\$ or screen\$ or assess\$)).tw.  
72. (eye\$ adj3 (test\$ or screen\$ or assess\$)).tw.  
73. ((target\$ or tailor\$) adj3 intervention\$).tw.  
74. (cultural\$ adj3 (sensitiv\$ or appropriate)).tw.  
75. culture/  
76. or/44-75
77. 18 and 43 and 76  
78. exp developing countries/  
79. 77 not 78  
80. prevalence.ti.  
81. (genetic or mutation\$ or autosomal or variant\$).ti.  
82. optical coherence tomography.tw.  
83. (Latin American and Caribbean Health Sciences).tw.  
84. or/80-83  
85. 79 not 84  
86. exp case report/  
87. (case\$ adj3 (report\$ or series)).tw.  
88. 86 or 87  
89. 85 not 88
